# Supplementary material
Source: Springer Nature journal article supplement (https://www.springermedizin.de/resource/supplementary/13054_2013_3030_MOESM1_ESM.pdf/9712434)
Supplement: MOESM1 [file 9712434]

## Appendix A: Search Strategies

---

### MEDLINE

1. intensive care units, pediatric/
2. ((critical\$ or intensive) adj2 (care or ill\$)).mp.
3. (picu or icu or pccu).mp.
4. or/1-3
5. child:.mp.
6. adolescent:.mp.
7. infan:.mp.
8. or/5-7
9. (neonat\$ or newborn or NICU or "low birth\$" or VLBW or LBW or birthweight or preterm or "pre-term" or prematur\$).ti.
10. randomized controlled trial.pt.
11. controlled clinical trial.pt.
12. randomized.ab.
13. placebo.ab.
14. clinical trials as topic.sh.
15. randomly.ab.
16. trial.ti.
17. or/10-16
18. exp animals/ not humans.sh.
19. (4 and 8 and 17) not (9 or 18)

### EMBASE

1. exp intensive care unit/
2. exp intensive care/
3. ((critical\$ or intensive) adj2 (care or ill\$)).mp.
4. (picu or icu or pccu).mp.
5. or/1-4
6. child:.mp.
7. adolescent:.mp.
8. infan:.mp.
9. or/6-8
10. newborn intensive care/ or (neonat\$ or newborn or NICU or "low birth\$" or VLBW or LBW or birthweight or preterm or "pre-term" or prematur\$).ti.
11. exp animals/ not humans.sh.
12. random:.tw.
13. placebo:.mp.
14. double-blind:.tw.
15. or/12-14
16. (5 and 9 and 15) not (10 or 11)

### CENTRAL

- #1 picu or icu or pccu
- #2 MeSH descriptor Intensive Care Units, Pediatric, this term only
- #3 (critical\* or intensive) near/2 (care or ill or illness)
- #4 child\* or infan\* or adolescent\*
- #5 pediatric\* or paediatric\*
- #6 (neonat\* or newborn or nicu or preterm or "pre-term" or prematur\* or "low birth\*" or LBW or VLBW or birthweight):ti
- #7 (( #1 OR #2 OR #3 ) AND ( #4 OR #5 ))
- #8 (#7 AND NOT #6)

### LILACS

(MH:"Intensive Care Units, Pediatric" OR MH:"Intensive Care " OR MH: "Critical Care" OR "Cuidados Críticos" OR "Cuidados Intensivos" OR "Intensive care" OR "Critical care" OR "critically ill" OR "critical illness" OR PICU OR "UTI pediátrica" OR "Unidade de Terapia Intensiva") AND (MH:"Infant" OR MH:"Child, Preschool" OR MH:"Child" OR Preescolar\$ OR Pré-Escolar\$ OR Niño\$ OR Criança\$ OR Infant\$ OR Lactante\$ OR child\$ OR pediatric\$ OR paediatric\$)
